# Supplementary material
Source: Springer Nature journal article supplement (https://www.springermedizin.de/resource/supplementary/13633_2014_352_MOESM5_ESM.pdf/9596138)

NFSS males - age to AH gain

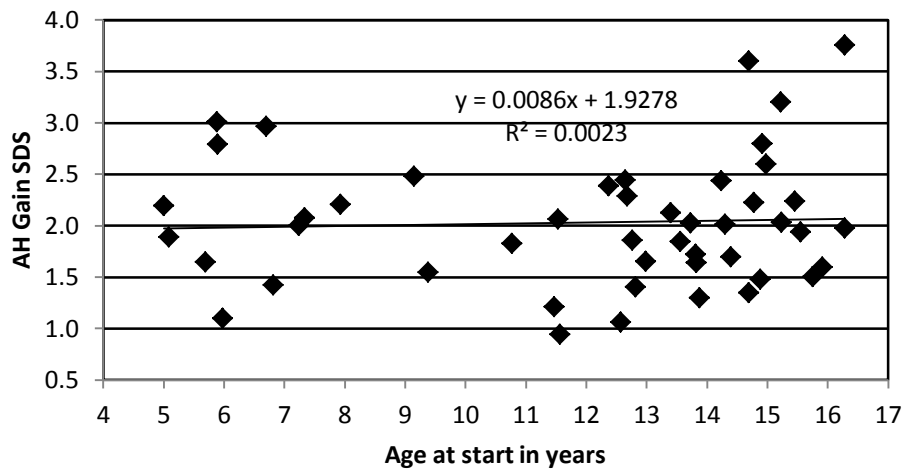

NFSS males - duration to AH gain

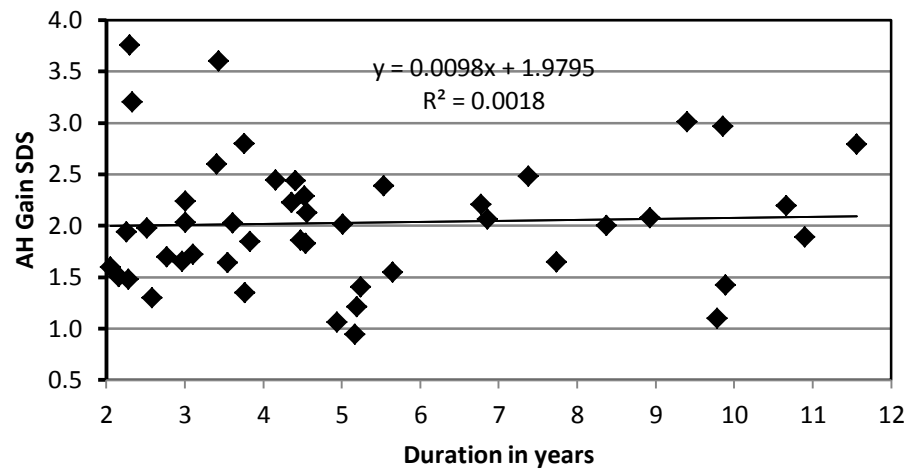

FSS males - start age to AH gain

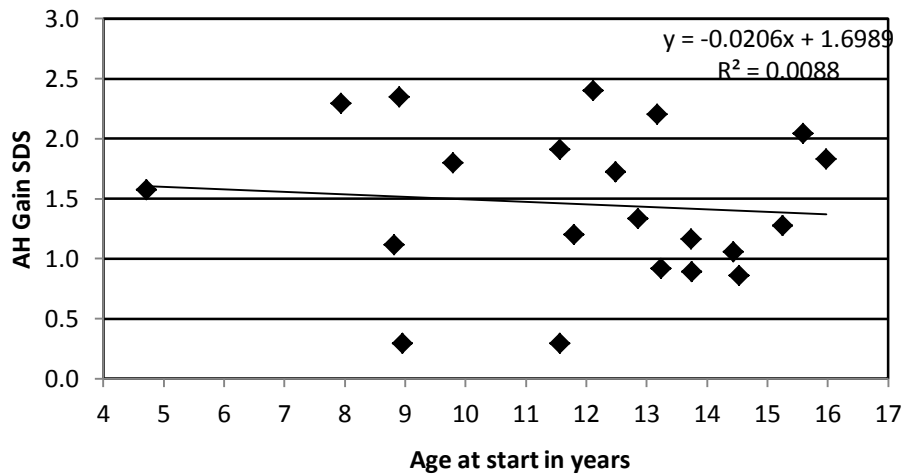

FSS males - duration to AH gain

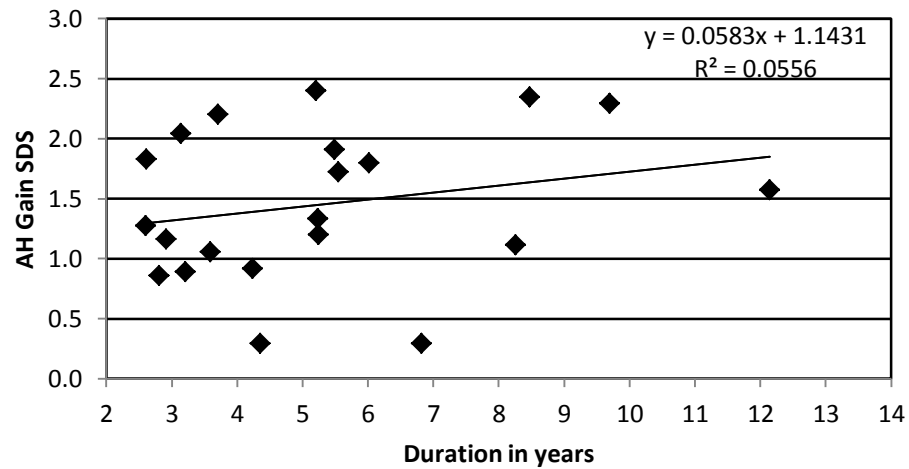

Supplement: MOESM5 [file 9596138]
